# Supplementary material for: Construction of a MnCo2O4@NiyMx (S and P) crosslinked network for efficient electrocatalytic water splitting
Source: Royal Society of Chemistry journal article supplement (doi:10.1039/c9ce01594a), 2019-01-01
Supplement: c9ce01594a1.pdf [file c9ce01594a1.pdf]

## Construction of $\text{MnCo}_2\text{O}_4@\text{Ni}_y\text{M}_x$ (S and P) crosslinked network for efficient electrocatalytic water splitting

Xiaoqiang Du<sup>a\*</sup> Jianpeng Fu<sup>a</sup> and Xiaoshuang Zhang<sup>b</sup>

a. School of Chemical Engineering and Technology, North University of China, Taiyuan 030051, People's Republic of China.

b. School of Science, North University of China, Taiyuan 030051, People's Republic of China. E-mail: duxq16@nuc.edu.cn, 20160068@nuc.edu.cn

### Gas detection

The same volume of gas sample in the headspace of the electrolytic cell was withdrawn by a SGE gas-tight syringe and analyzed by gas chromatography (GC). The  $\text{H}_2$  in the sampled gas was separated by passing through a  $2\text{ m} \times 3\text{ mm}$  packed molecular sieve 5A column with an Ar carrier gas and quantified by a Thermal Conductivity Detector (TCD)(Shimadzu GC-9A).

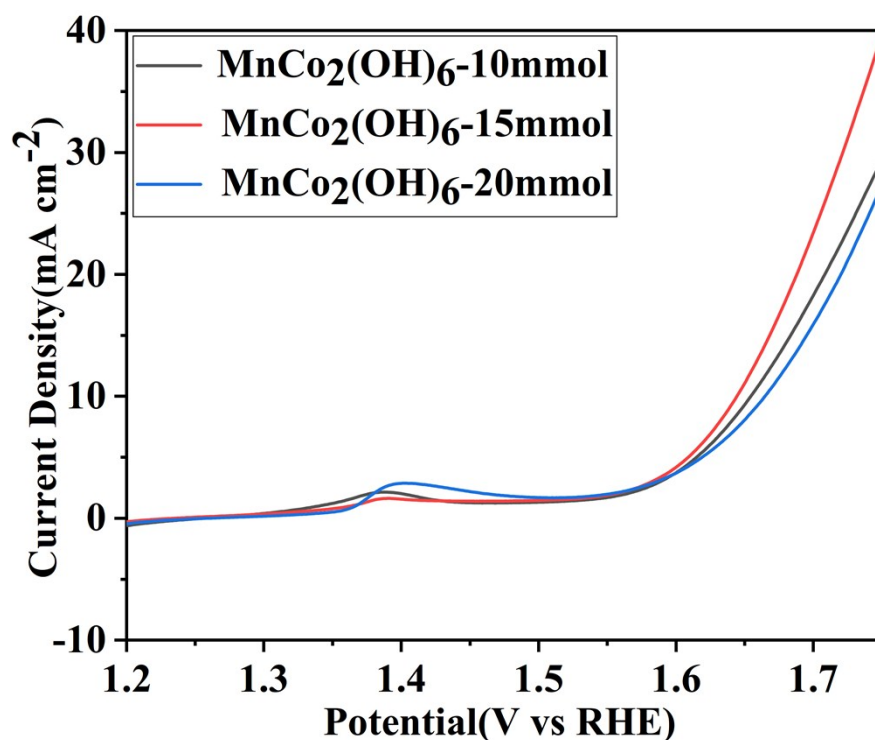

Fig. S1 OER polarization curves of  $\text{MnCo}_2(\text{OH})_6$ -10mmol,  $\text{MnCo}_2(\text{OH})_6$ -15mmol and  $\text{MnCo}_2(\text{OH})_6$ -20mmol.

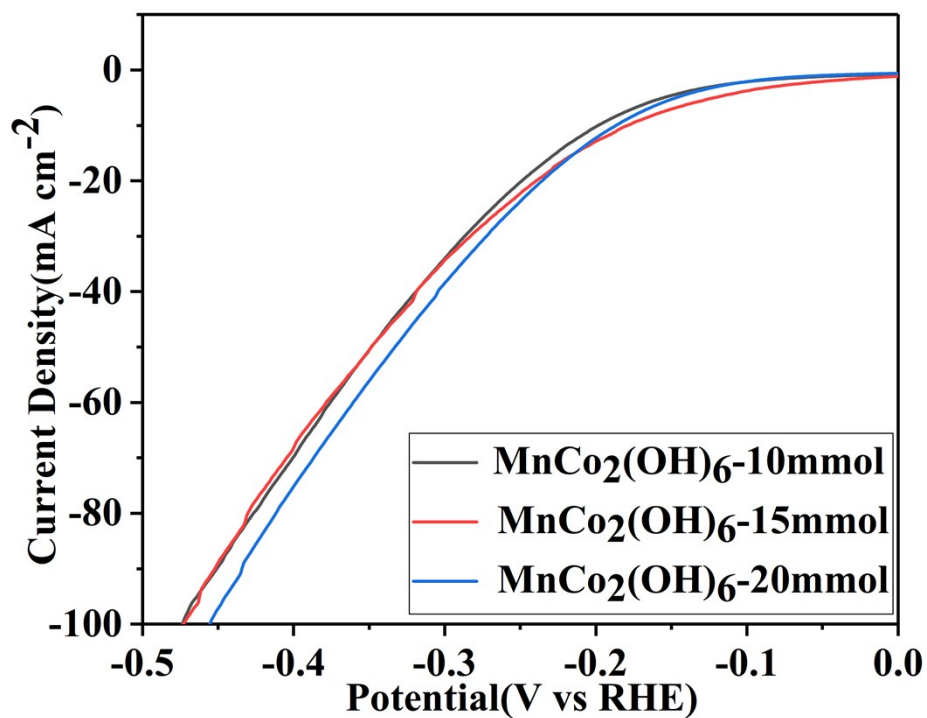

Fig. S2 HER polarization curves of MnCo<sub>2</sub>(OH)<sub>6</sub>-10mmol, MnCo<sub>2</sub>(OH)<sub>6</sub>-15mmol and MnCo<sub>2</sub>(OH)<sub>6</sub>-20mmol.

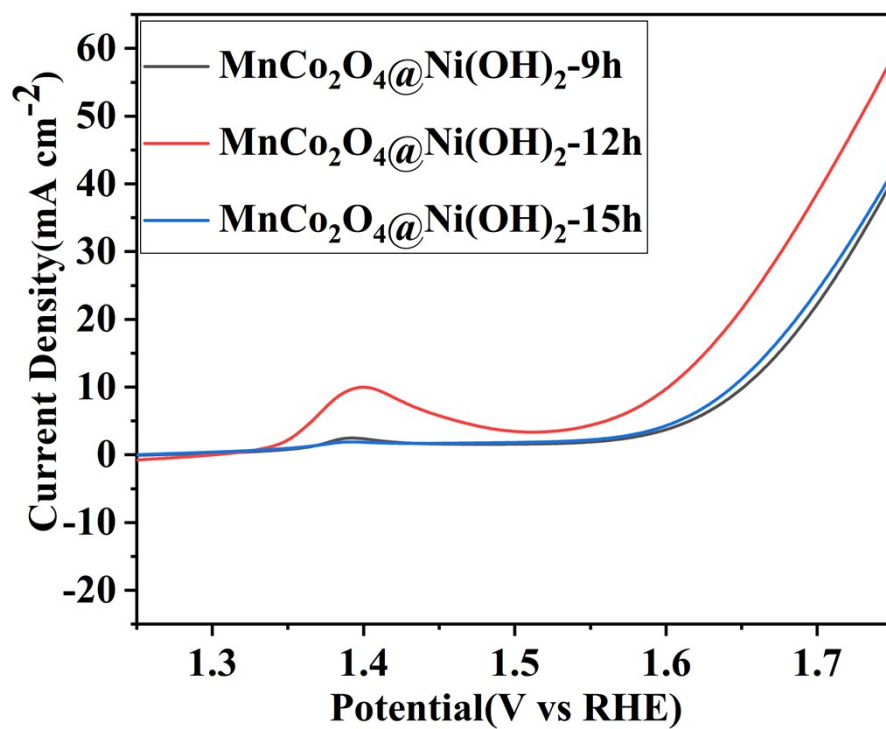

Fig. S3 OER polarization curves of MnCo<sub>2</sub>O<sub>4</sub>@Ni(OH)<sub>2</sub>-9h, MnCo<sub>2</sub>O<sub>4</sub>@Ni(OH)<sub>2</sub>-12h and MnCo<sub>2</sub>O<sub>4</sub>@Ni(OH)<sub>2</sub>-15h.

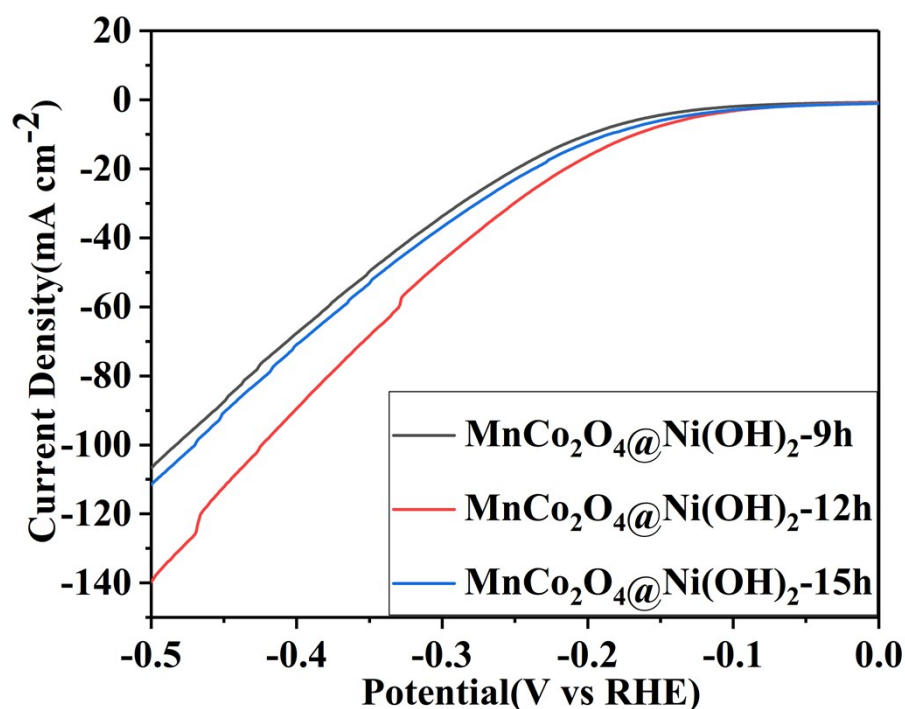

Fig. S4 HER polarization curves of  $\text{MnCo}_2\text{O}_4@\text{Ni}(\text{OH})_2$ -9h,  $\text{MnCo}_2\text{O}_4@\text{Ni}(\text{OH})_2$ -12h and  $\text{MnCo}_2\text{O}_4@\text{Ni}(\text{OH})_2$ -15h

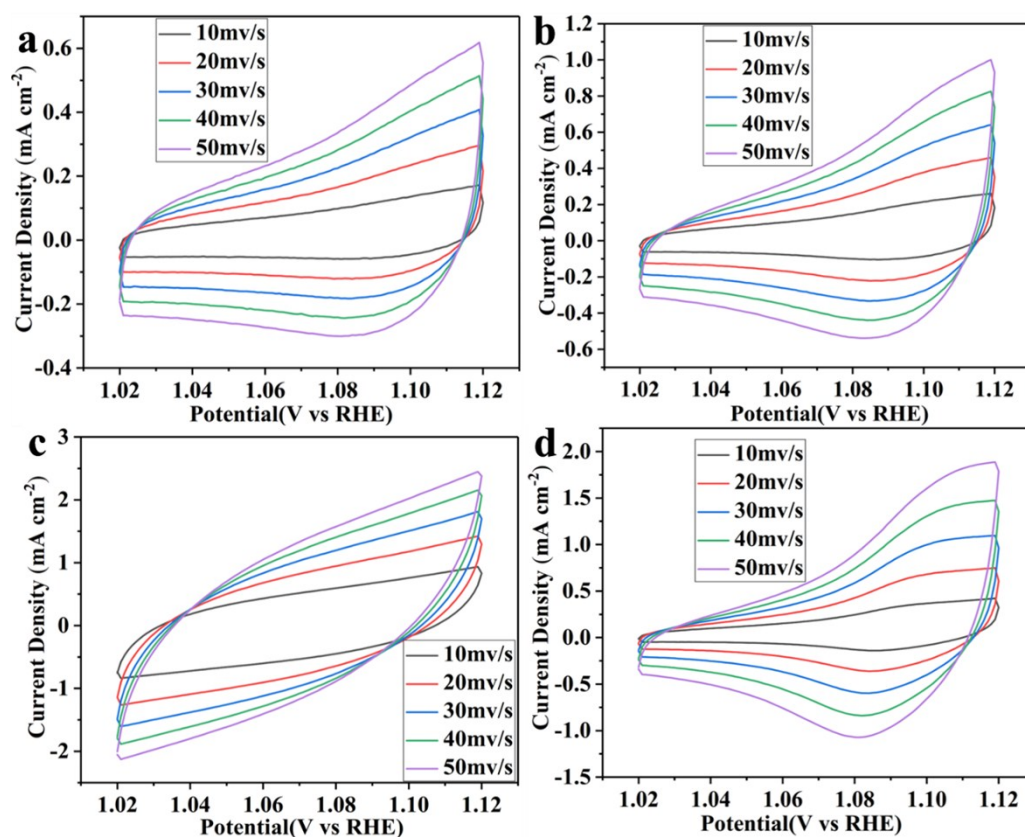

Fig. S5 CVs of  $\text{MnCo}_2(\text{OH})_6$ -15mmol (a),  $\text{MnCo}_2\text{O}_4@\text{Ni}(\text{OH})_2$ -12h (b),  $\text{MnCo}_2\text{O}_4@\text{Ni}_3\text{S}_2$  (c) and  $\text{MnCo}_2\text{O}_4@\text{NiP}_2$  (d) with different scan rates (10-50  $\text{mV s}^{-1}$ ) in the region of 1.02-1.12V vs RHE.

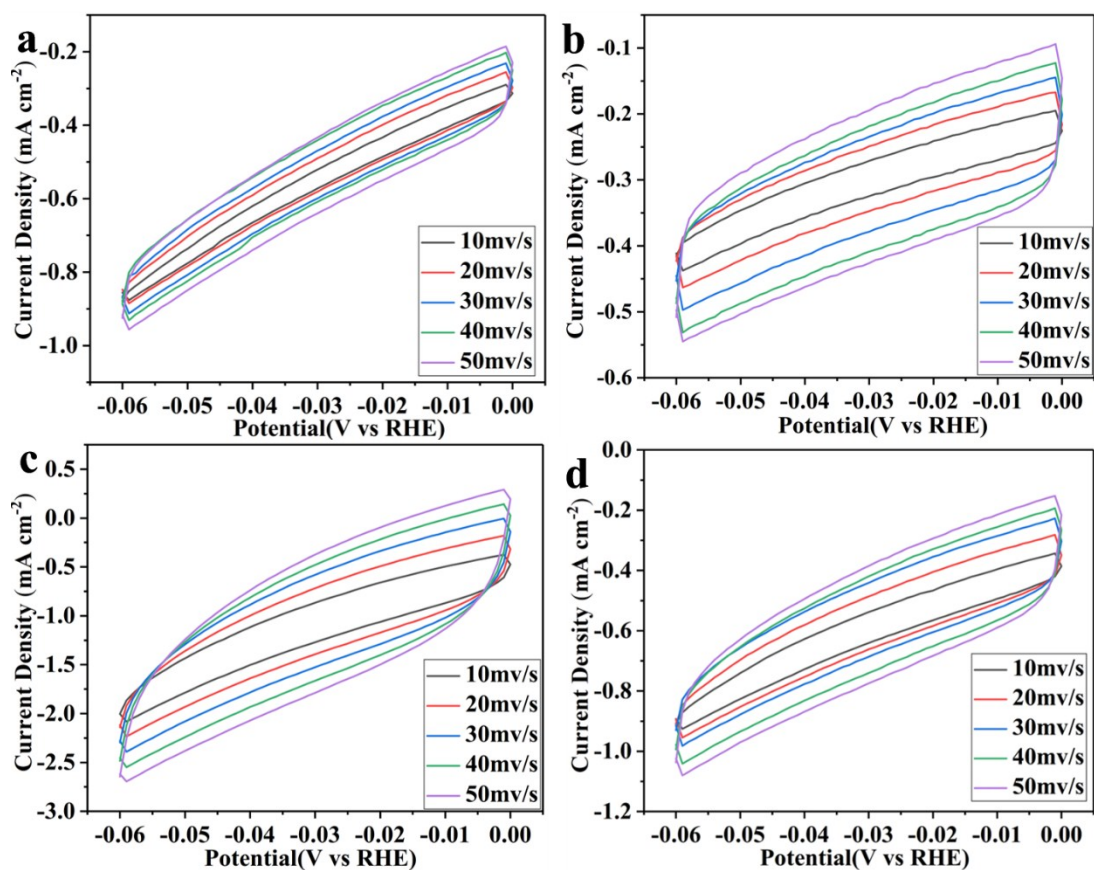

**Fig. S6** CV<sub>s</sub> of MnCo<sub>2</sub>(OH)<sub>6</sub>-15mmol (a), MnCo<sub>2</sub>O<sub>4</sub>@Ni(OH)<sub>2</sub>-12h (b), MnCo<sub>2</sub>O<sub>4</sub>@Ni<sub>3</sub>S<sub>2</sub> (c) and MnCo<sub>2</sub>O<sub>4</sub>@NiP<sub>2</sub> (d) with different scan rates (10-50 mV s<sup>-1</sup>) in the region of -0.06 —0V vs RHE.

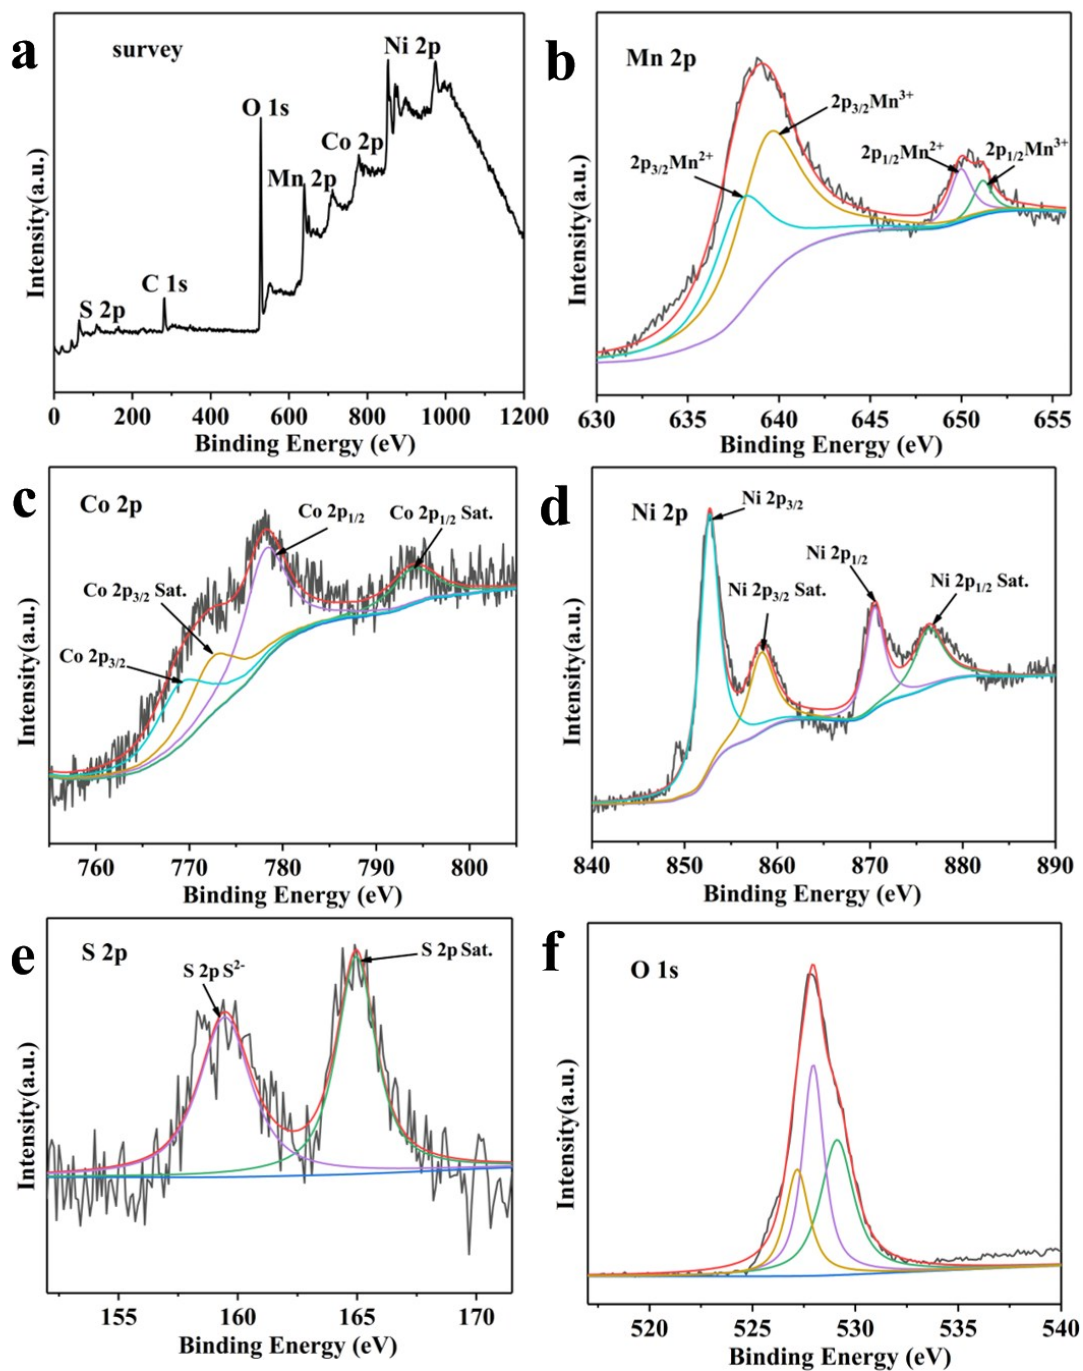

**Fig. S7** XPS spectra of  $MnCo_2O_4@Ni_3S_2$  after electrochemical testing: (a) survey scan, (b) Mn 2p, (c) Co 2p, (d) Ni 2p, (e) S 2p and (f) O 1s.

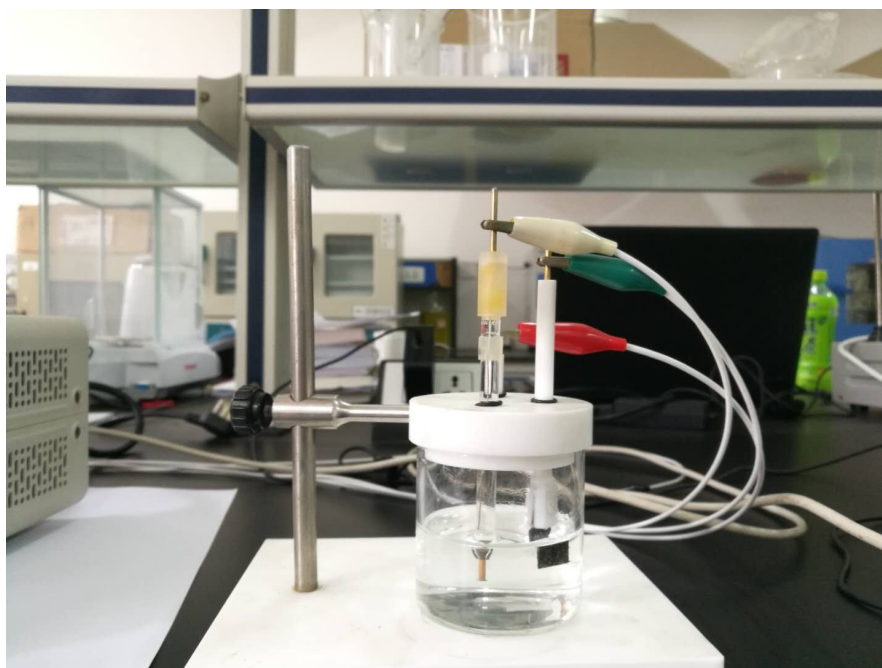

**Fig.S8** A photograph showing generation of O<sub>2</sub> bubbles on the MnCo<sub>2</sub>O<sub>4</sub>@Ni<sub>3</sub>S<sub>2</sub> electrodes.

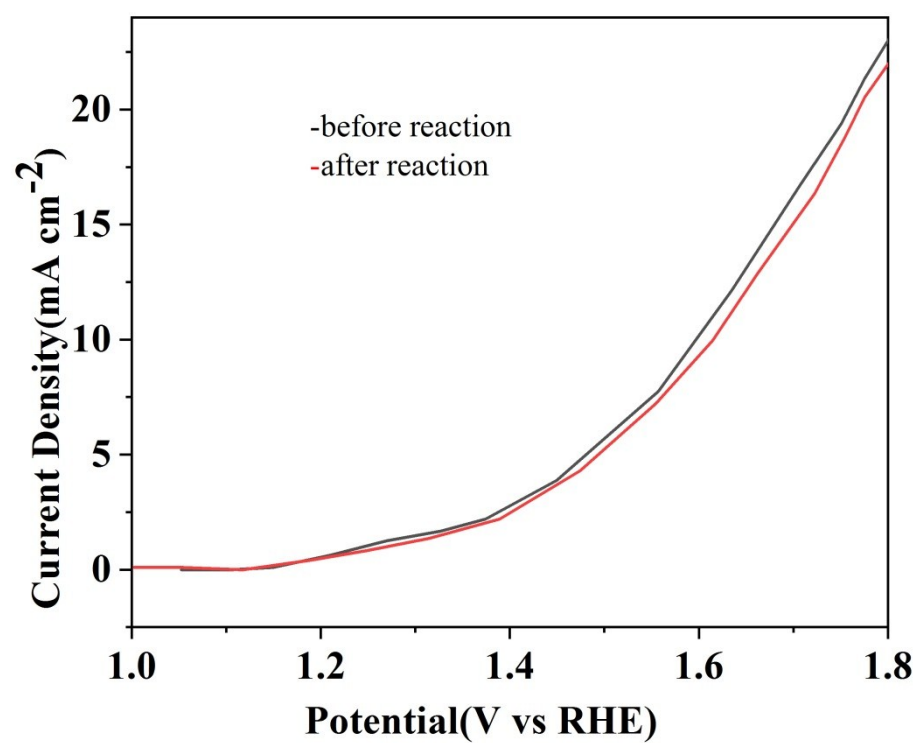

**Fig. S9** LSV curve of MnCo<sub>2</sub>O<sub>4</sub>@Ni<sub>3</sub>S<sub>2</sub> for water splitting before and after reaction.

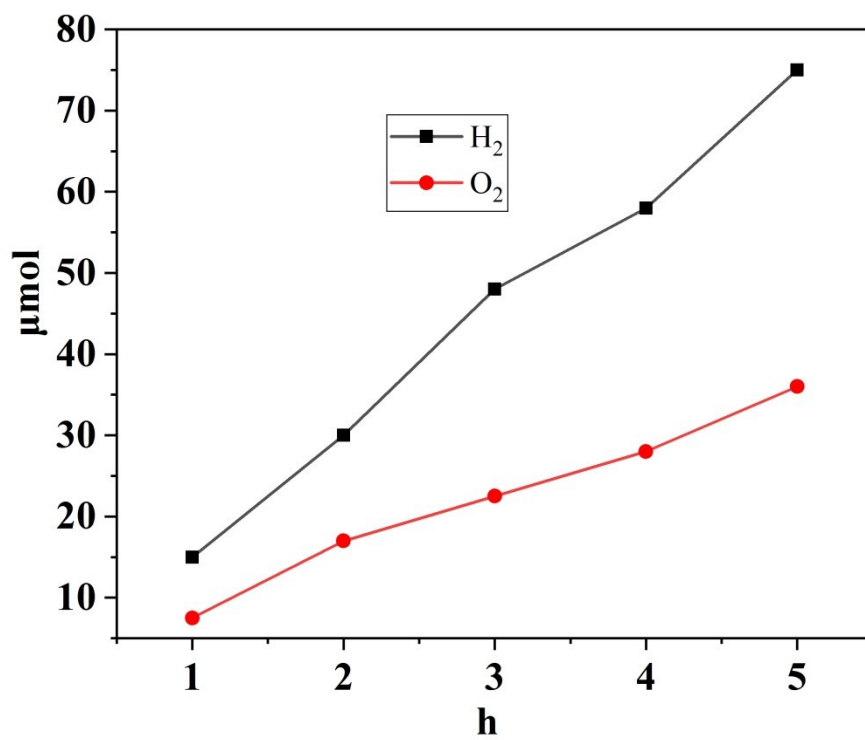

**Fig. S10** (a) Kinetics of O<sub>2</sub> and H<sub>2</sub> formation in the electrocatalytic system using MnCo<sub>2</sub>O<sub>4</sub>@Ni<sub>3</sub>S<sub>2</sub>.
